# Supplementary material for: A butenolide intermediate in methylenomycin furan biosynthesis is implied by incorporation of stereospecifically 13C-labelled glycerols
Source: Royal Society of Chemistry journal article supplement (doi:10.1039/c000496k), 2010-01-01
Supplement: c000496k.pdf [file c000496k.pdf]

## A butenolide intermediate in methylenomycin furan biosynthesis is implied by incorporation of stereospecifically $^{13}\text{C}$ -labelled glycerols

Christophe Corre, Stuart W. Haynes, Nicolas Malet, Lijiang Song and Gregory L. Challis\*

### Experimental Procedures

Compound **2** was synthesised according to the procedure of Sello and co-workers.<sup>1</sup> The O-deuterated derivative of **2** was prepared by suspending a small sample in a 1:1 mixture of  $\text{CD}_3\text{OD}/\text{D}_2\text{O}$  prior to high resolution ESI-MS/MS analysis.

For the incorporation experiments, fresh spores of *S. coelicolor* W74 were prepared from one MS agar<sup>2</sup> Petri plate by resuspension in sterile water and directly used to inoculate 50 mL SMM medium<sup>2</sup> containing 50 mg of  $[1-^{13}\text{C}]$ -L-glycerol or  $[3-^{13}\text{C}]$ -L-glycerol as the only carbon source. After 5 days of incubation at 30 °C, both cultures were filtered and the acidified supernatants (pH 3) were extracted with EtOAc. After evaporation of the organic extract, **2** was purified from the residue according to a previously described procedure<sup>3</sup> and resuspended in 1:1 MeOH/ $\text{H}_2\text{O}$  (1 mL) for high resolution ESI-MS/MS analysis.

### High resolution ESI-MS analysis of MMF2 isolated from the feeding experiments

High resolution ESI-MS/MS analyses of synthetic and labelled **2** were carried out on a Bruker MaXis time-of-flight mass spectrometer using the following settings. End plate off-set: -500 V; Capillary: +4000 V; Nebulizer: 1.6 Bar; Dry gas: 8.0 L/min; Dry temperature: 180 °C; Ion transfer: Ion funnel RF: 200 Vpp; Multiple RF: 200 Vpp; Quadrupole: Ion Energy: 4.0 eV; Low Mass: 55 m/z; Collision Cell RF: 350 Vpp; Ion Cooler RF (Collision sweeping): 50 Vpp (50%) + 250 Vpp (50%); Transfer time: 120  $\mu\text{s}$ ; Pre-Pulse Storage: 1  $\mu\text{s}$ ; MRM setting: Isolation width: 1.00 Da; Collision Energy: 4.0 eV (Isolation) and 20.0 eV (Fragmentation).

Compound **2** isolated from the feeding experiment with  $[3-^{13}\text{C}]$ -L-glycerol was predominantly singly  $^{13}\text{C}$ -labelled ( $m/z = 184.0688$ ), with some unlabelled material ( $m/z = 183.0658$ ) also present (top spectrum). Compound **2** isolated from the feeding experiment with  $[1-^{13}\text{C}]$ -L-glycerol contained a mixture of unlabelled ( $m/z = 183.0660$ ), singly ( $m/z = 184.0692$ ), doubly ( $m/z = 185.0723$ ), triply ( $m/z = 186.0758$ ) and quadruply ( $m/z = 187.0790$ )  $^{13}\text{C}$ -labelled material (bottom spectrum).

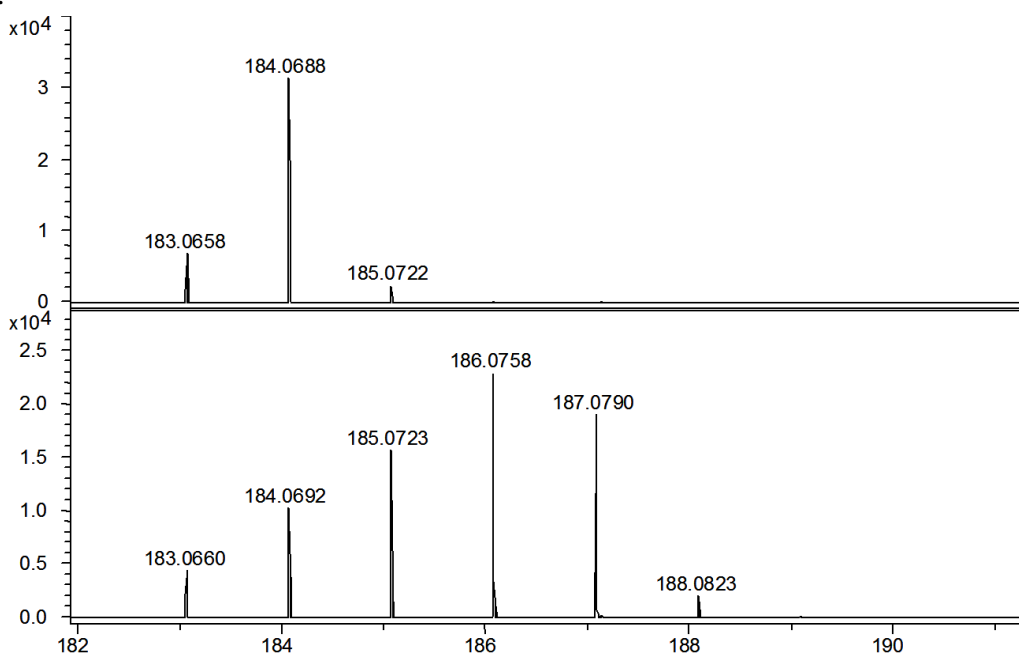

## References

1. J. B. Davis, J. D. Bailey and J. K. Sello, *Org. Lett.*, 2009, **11**, 2984-2987.
2. T. Kieser, M. J. Bibb, M. J. Buttner, K. F. Chater and D. A. Hopwood, *Practical Streptomyces Genetics*, John Innes Foundation, Norwich (2000).
3. C. Corre, L. Song, S. O'Rourke, K. F. Chater and G. L. Challis, *Proc. Natl Acad. Sci. USA*, 2008, **105**, 17510-17515.
